# Supplementary material
Source: MDPI journal article supplement (https://www.mdpi.com/2075-163X/11/7/757)
Supplement: s1 [file s1]

Archive with 2 entries (2 files):
- Supplementary Figures.pdf
- Supplementary Table S1.xlsx
