# Supplementary material
Source: MDPI journal article supplement (https://www.mdpi.com/2075-163X/11/7/757)
Supplement: s1 [file s1 › Supplementary Table S1.xlsx]

## Sheet: Sheet1
Taxonomical characterization (% match between brackets)						Nr of reads per OTU and per sample with code Dx (with x = time in days after first injection)
Phylum	Order	Class	Family	Genus	OTU name	D1	D6	D13	D27	D64	D106	D113	D120	D134	D166
Proteobacteria(100)	Gammaproteobacteria(100)	Pseudomonadales(100)	Pseudomonadaceae(100)	Pseudomonas(100)	OTU1	19589	15057	3124	6878	16099	16770	13291	17456	11472	12145
Proteobacteria(100)	Gammaproteobacteria(100)	Pseudomonadales(100)	Pseudomonadaceae(100)	Pseudomonadaceae_unclassified(100)	OTU100	0	0	0	0	0	4	0	0	0	0
Bacteroidetes(91)	Bacteroidetes_unclassified(91)	Bacteroidetes_unclassified(91)	Bacteroidetes_unclassified(91)	Bacteroidetes_unclassified(91)	OTU102	0	0	0	0	0	0	0	0	0	1
Proteobacteria(100)	Gammaproteobacteria(100)	Pseudomonadales(99)	Pseudomonadaceae(99)	Pseudomonadaceae_unclassified(99)	OTU103	0	0	0	0	0	0	0	0	0	5
Proteobacteria(100)	Gammaproteobacteria(100)	Methylococcales(100)	Methylococcaceae(100)	Methylovulum(96)	OTU104	0	0	0	0	0	0	0	2	0	0
Proteobacteria(89)	Gammaproteobacteria(89)	Pseudomonadales(87)	Pseudomonadaceae(87)	Pseudomonadaceae_unclassified(87)	OTU105	0	0	0	0	0	0	0	3	0	0
Proteobacteria(100)	Betaproteobacteria(100)	Burkholderiales(99)	Burkholderiaceae(97)	Limnobacter(96)	OTU11	28	14	6	2	8	44	106	57	902	20
Proteobacteria(100)	Betaproteobacteria(100)	Burkholderiales(100)	Comamonadaceae(100)	Acidovorax(100)	OTU12	405	358	71	32	26	118	162	83	368	71
Proteobacteria(100)	Alphaproteobacteria(100)	Caulobacterales(100)	Caulobacteraceae(100)	Caulobacter(100)	OTU13	0	0	0	4	8	0	0	0	0	0
Firmicutes(100)	Clostridia(98)	Clostridiales(96)	Peptococcaceae_2(88)	Peptococcaceae_2_unclassified(88)	OTU14	982	201	44	96	70	369	408	172	392	94
Firmicutes(100)	Bacilli(100)	Bacillales(100)	Bacillaceae_2(99)	Vulcanibacillus(96)	OTU15	223	332	52	96	65	45	104	483	962	976
Proteobacteria(100)	Betaproteobacteria(100)	Hydrogenophilales(100)	Hydrogenophilaceae(100)	Thiobacillus(100)	OTU16	0	0	0	0	11	58	79	480	619	173
Proteobacteria(100)	Alphaproteobacteria(100)	Caulobacterales(100)	Caulobacteraceae(100)	Brevundimonas(100)	OTU17	228	169	60	9	51	93	119	184	548	90
Firmicutes(98)	Firmicutes_unclassified(98)	Firmicutes_unclassified(98)	Firmicutes_unclassified(98)	Firmicutes_unclassified(98)	OTU18	0	8	47	222	373	11	13	64	83	216
Firmicutes(100)	Clostridia(100)	Clostridiales(100)	Peptococcaceae_1(100)	Dehalobacter(89)	OTU19	0	0	0	0	115	3	23	150	359	53
Firmicutes(100)	Clostridia(100)	Clostridiales(100)	Peptococcaceae_1(100)	Desulfosporosinus(100)	OTU2	732	3359	16416	2280	1225	775	916	409	715	498
Proteobacteria(100)	Betaproteobacteria(100)	Betaproteobacteria_unclassified(100)	Betaproteobacteria_unclassified(100)	Betaproteobacteria_unclassified(100)	OTU20	191	391	37	43	12	21	52	98	177	439
Firmicutes(100)	Clostridia(100)	Clostridiales(100)	Gracilibacteraceae(100)	Gracilibacter(99)	OTU21	106	85	14	54	63	219	324	117	237	45
Proteobacteria(100)	Alphaproteobacteria(100)	Sphingomonadales(100)	Sphingomonadaceae(100)	Novosphingobium(100)	OTU22	36	0	0	32	57	67	51	144	283	206
Proteobacteria(100)	Alphaproteobacteria(100)	Rhodobacterales(100)	Rhodobacteraceae(100)	Rhodobacteraceae_unclassified(100)	OTU23	0	0	0	0	0	17	14	14	94	6
Firmicutes(100)	Clostridia(100)	Clostridiales(100)	Peptococcaceae_1(100)	Dehalobacter(94)	OTU24	5	6	0	222	26	5	17	5	6	11
Firmicutes(100)	Clostridia(100)	Clostridiales(100)	Peptococcaceae_1(100)	Desulfosporosinus(100)	OTU25	8	13	8	0	7	22	1	27	224	24
Firmicutes(100)	Clostridia(100)	Clostridiales(100)	Clostridiales_Incertae_Sedis_XIII(94)	Anaerovorax(94)	OTU26	35	43	47	182	144	69	83	74	85	36
Proteobacteria(100)	Betaproteobacteria(100)	Rhodocyclales(100)	Rhodocyclaceae(100)	Rhodocyclaceae_unclassified(100)	OTU27	0	0	0	0	0	0	0	3	24	0
Proteobacteria(100)	Gammaproteobacteria(100)	Pseudomonadales(100)	Pseudomonadaceae(100)	Pseudomonas(100)	OTU28	1	6	0	1	0	9	25	9	116	1
Firmicutes(92)	Clostridia(90)	Clostridia_unclassified(90)	Clostridia_unclassified(90)	Clostridia_unclassified(90)	OTU29	0	0	0	0	113	7	11	18	14	87
Proteobacteria(100)	Alphaproteobacteria(100)	Sphingomonadales(100)	Sphingomonadaceae(100)	Sphingosinicella(100)	OTU30	9	69	14	15	17	4	11	39	92	81
Chloroflexi(98)	Thermomicrobia(92)	Sphaerobacterales(89)	Sphaerobacteraceae(89)	Sphaerobacteraceae_unclassified(89)	OTU31	20	101	21	9	15	6	7	31	64	38
Actinobacteria(100)	Actinobacteria(100)	Actinomycetales(100)	Nocardioidaceae(100)	Nocardioides(100)	OTU32	59	15	17	12	0	12	26	4	3	1
Bacteroidetes(100)	Cytophagia(100)	Cytophagales(100)	Cyclobacteriaceae(100)	Algoriphagus(100)	OTU33	0	6	0	0	1	2	6	17	87	13
Proteobacteria(100)	Alphaproteobacteria(97)	Rhodospirillales(93)	Rhodospirillaceae(81)	Rhodospirillaceae_unclassified(81)	OTU34	21	39	9	28	14	29	24	52	75	25
Actinobacteria(100)	Actinobacteria(100)	Actinomycetales(100)	Cellulomonadaceae(97)	Actinotalea(85)	OTU35	48	83	70	53	38	24	41	21	55	55
Bacteria_unclassified(99)	Bacteria_unclassified(99)	Bacteria_unclassified(99)	Bacteria_unclassified(99)	Bacteria_unclassified(99)	OTU36	0	0	0	0	0	2	3	0	38	0
Firmicutes(100)	Clostridia(100)	Clostridiales(100)	Clostridiales_unclassified(100)	Clostridiales_unclassified(100)	OTU37	65	40	4	15	32	31	57	44	47	49
Proteobacteria(100)	Gammaproteobacteria(100)	Gammaproteobacteria_unclassified(100)	Gammaproteobacteria_unclassified(100)	Gammaproteobacteria_unclassified(100)	OTU38	0	4	1	0	8	0	1	3	20	86
Firmicutes(100)	Clostridia(98)	Clostridiales(98)	Ruminococcaceae(98)	Clostridium_III(94)	OTU39	6	21	15	8	5	11	24	47	58	38
Firmicutes(100)	Clostridia(90)	Clostridiales(90)	Peptococcaceae_2(86)	Peptococcaceae_2_unclassified(86)	OTU4	86	147	1694	14337	5898	1032	1120	1964	1573	5975
Actinobacteria(100)	Actinobacteria(100)	Actinomycetales(100)	Microbacteriaceae(100)	Microbacteriaceae_unclassified(100)	OTU40	0	0	0	0	1	0	0	1	57	0
Actinobacteria(100)	Actinobacteria(100)	Actinomycetales(100)	Intrasporangiaceae(100)	Intrasporangiaceae_unclassified(100)	OTU41	1	19	10	7	4	1	0	21	28	20
Proteobacteria(100)	Betaproteobacteria(100)	Rhodocyclales(100)	Rhodocyclaceae(100)	Methyloversatilis(95)	OTU42	9	45	4	3	0	5	7	23	32	12
Firmicutes(98)	Firmicutes_unclassified(98)	Firmicutes_unclassified(98)	Firmicutes_unclassified(98)	Firmicutes_unclassified(98)	OTU43	23	7	7	18	31	12	6	23	42	41
Firmicutes(100)	Clostridia(100)	Clostridiales(100)	Peptococcaceae_2(97)	Peptococcaceae_2_unclassified(97)	OTU44	24	28	3	4	1	10	11	19	31	23
Proteobacteria(100)	Alphaproteobacteria(100)	Sphingomonadales(100)	Sphingomonadaceae(99)	Sphingomonadaceae_unclassified(99)	OTU45	82	230	44	16	17	34	44	73	158	69
Firmicutes(100)	Clostridia(100)	Clostridiales(100)	Clostridiales_unclassified(100)	Clostridiales_unclassified(100)	OTU46	5	7	0	3	3	5	12	16	33	39
Chloroflexi(95)	Thermomicrobia(92)	Sphaerobacterales(91)	Sphaerobacteraceae(91)	Sphaerobacteraceae_unclassified(91)	OTU47	8	27	10	3	6	0	0	5	14	27
Proteobacteria(100)	Alphaproteobacteria(100)	Rhizobiales(100)	Phyllobacteriaceae(88)	Phyllobacteriaceae_unclassified(88)	OTU48	4	20	0	3	0	3	3	4	3	2
Proteobacteria(100)	Betaproteobacteria(100)	Burkholderiales(100)	Burkholderiales_incertae_sedis(100)	Aquabacterium(100)	OTU49	10	34	2	5	4	3	5	3	6	5
Chloroflexi(99)	Anaerolineae(99)	Anaerolineales(99)	Anaerolineaceae(99)	Ornatilinea(82)	OTU5	1579	2953	1310	1689	2790	6758	8600	5170	5596	5590
Proteobacteria(100)	Alphaproteobacteria(100)	Rhizobiales(100)	Bradyrhizobiaceae(100)	Rhodopseudomonas(88)	OTU50	6	12	4	7	1	0	0	8	31	7
Bacteroidetes(100)	Sphingobacteriia(100)	Sphingobacteriales(100)	Sphingobacteriaceae(100)	Pedobacter(99)	OTU51	20	32	4	8	0	4	20	6	10	0
Proteobacteria(100)	Alphaproteobacteria(100)	Rhizobiales(100)	Hyphomicrobiaceae(100)	Hyphomicrobium(100)	OTU52	6	23	0	0	0	0	0	3	5	1
Proteobacteria(100)	Alphaproteobacteria(100)	Alphaproteobacteria_unclassified(100)	Alphaproteobacteria_unclassified(100)	Alphaproteobacteria_unclassified(100)	OTU53	2	0	0	3	0	0	0	0	17	3
Acidobacteria(100)	Acidobacteria_Gp3(100)	Gp3(93)	Gp3_unclassified(93)	Gp3_unclassified(93)	OTU54	3	13	4	6	0	3	0	15	15	16
Actinobacteria(100)	Actinobacteria(100)	Actinomycetales(100)	Nocardioidaceae(100)	Nocardioidaceae_unclassified(100)	OTU55	0	14	2	4	1	0	0	6	7	13
Proteobacteria(100)	Gammaproteobacteria(100)	Pseudomonadales(100)	Pseudomonadaceae(100)	Pseudomonas(100)	OTU56	4	8	0	2	0	0	0	0	6	0
Proteobacteria(100)	Alphaproteobacteria(100)	Rhizobiales(100)	Xanthobacteraceae(83)	Xanthobacteraceae_unclassified(83)	OTU57	0	3	17	1	3	0	0	0	7	2
Proteobacteria(100)	Alphaproteobacteria(100)	Caulobacterales(100)	Caulobacteraceae(100)	Phenylobacterium(99)	OTU58	35	26	0	0	0	1	3	12	34	17
Proteobacteria(100)	Alphaproteobacteria(100)	Rhodobacterales(100)	Rhodobacteraceae(100)	Defluviimonas(82)	OTU59	0	0	0	0	0	0	0	0	6	0
Proteobacteria(100)	Alphaproteobacteria(100)	Rhizobiales(100)	Rhizobiales_unclassified(100)	Rhizobiales_unclassified(100)	OTU60	0	0	0	0	0	0	0	0	10	10
Acidobacteria(100)	Acidobacteria_Gp3(100)	Gp3(92)	Gp3_unclassified(92)	Gp3_unclassified(92)	OTU62	0	3	0	3	0	0	0	3	3	0
Chloroflexi(100)	Caldilineae(98)	Caldilineales(98)	Caldilineaceae(98)	Litorilinea(93)	OTU63	0	0	0	0	0	0	0	0	5	0
Proteobacteria(100)	Betaproteobacteria(100)	Burkholderiales(100)	Comamonadaceae(100)	Comamonadaceae_unclassified(100)	OTU64	0	5	1	0	0	2	0	3	3	2
Actinobacteria(100)	Actinobacteria(100)	Actinomycetales(100)	Geodermatophilaceae(100)	Blastococcus(81)	OTU65	0	1	0	0	0	0	0	0	2	0
Proteobacteria(100)	Gammaproteobacteria(100)	Pseudomonadales(98)	Pseudomonadaceae(98)	Pseudomonadaceae_unclassified(98)	OTU67	0	0	0	0	2	0	0	4	0	0
Proteobacteria(100)	Gammaproteobacteria(100)	Pseudomonadales(99)	Pseudomonadaceae(99)	Pseudomonadaceae_unclassified(99)	OTU68	0	2	0	1	0	4	2	1	5	0
Bacteria_unclassified(100)	Bacteria_unclassified(100)	Bacteria_unclassified(100)	Bacteria_unclassified(100)	Bacteria_unclassified(100)	OTU69	0	5	0	7	0	0	0	0	0	0
Proteobacteria(100)	Alphaproteobacteria(100)	Rhodospirillales(100)	Rhodospirillaceae(100)	Oceanibaculum(100)	OTU7	3534	1378	515	686	397	1680	2431	577	1401	310
Proteobacteria(100)	Gammaproteobacteria(100)	Pseudomonadales(100)	Pseudomonadaceae(100)	Pseudomonadaceae_unclassified(100)	OTU71	0	0	0	3	0	0	0	0	0	0
Firmicutes(100)	Clostridia(100)	Clostridiales(100)	Clostridiaceae_1(95)	Clostridiaceae_1_unclassified(95)	OTU72	0	0	0	0	2	0	0	0	2	0
Bacteroidetes(100)	Sphingobacteriia(100)	Sphingobacteriales(100)	Chitinophagaceae(100)	Vibrionimonas(100)	OTU74	3	2	0	0	0	0	0	0	0	0
Proteobacteria(100)	Alphaproteobacteria(100)	Rhizobiales(100)	Hyphomicrobiaceae(100)	Hyphomicrobium(99)	OTU75	0	1	0	0	0	0	0	0	0	0
Proteobacteria(100)	Betaproteobacteria(100)	Rhodocyclales(99)	Rhodocyclaceae(99)	Methyloversatilis(98)	OTU76	0	1	0	0	0	0	0	0	0	0
Proteobacteria(100)	Alphaproteobacteria(100)	Rhizobiales(100)	Bradyrhizobiaceae(100)	Bradyrhizobiaceae_unclassified(100)	OTU77	0	1	0	0	0	0	0	0	0	0
Proteobacteria(100)	Gammaproteobacteria(100)	Pseudomonadales(98)	Pseudomonadaceae(98)	Pseudomonadaceae_unclassified(98)	OTU78	0	0	0	0	0	0	0	0	1	0
Proteobacteria(100)	Alphaproteobacteria(100)	Caulobacterales(100)	Caulobacteraceae(100)	Phenylobacterium(95)	OTU79	0	3	0	0	0	0	0	0	1	0
Actinobacteria(100)	Actinobacteria(100)	Actinomycetales(100)	Propionibacteriaceae(100)	Propionicimonas(82)	OTU82	0	0	0	0	0	0	0	0	2	0
Firmicutes(100)	Clostridia(100)	Clostridiales(100)	Ruminococcaceae(100)	Faecalibacterium(100)	OTU84	0	0	0	0	0	0	0	0	2	0
Firmicutes(100)	Clostridia(100)	Clostridiales(100)	Peptococcaceae_1(100)	Desulfosporosinus(100)	OTU85	772	2425	4986	1622	1124	561	691	323	633	247
Proteobacteria(100)	Alphaproteobacteria(100)	Sphingomonadales(100)	Sphingomonadaceae(80)	Sphingomonadaceae_unclassified(80)	OTU86	0	0	4	0	0	0	0	0	0	0
Proteobacteria(100)	Gammaproteobacteria(100)	Pseudomonadales(100)	Pseudomonadaceae(100)	Pseudomonadaceae_unclassified(100)	OTU87	0	0	0	0	2	0	0	0	0	0
Proteobacteria(100)	Gammaproteobacteria(99)	Pseudomonadales(89)	Pseudomonadaceae(89)	Pseudomonadaceae_unclassified(89)	OTU88	0	0	0	0	0	0	2	0	0	0
Actinobacteria(100)	Actinobacteria(100)	Coriobacteriales(100)	Coriobacteriaceae(100)	Collinsella(100)	OTU89	0	0	0	0	0	0	2	0	0	0
Proteobacteria(100)	Deltaproteobacteria(100)	Desulfobacterales(100)	Desulfobacteraceae(100)	Desulfobacteraceae_unclassified(100)	OTU9	43	1166	363	321	171	96	103	468	1061	1046
Proteobacteria(100)	Gammaproteobacteria(100)	Pseudomonadales(94)	Pseudomonadaceae(94)	Pseudomonadaceae_unclassified(94)	OTU91	0	0	0	0	0	0	0	0	0	1
Proteobacteria(100)	Gammaproteobacteria(100)	Pseudomonadales(100)	Pseudomonadaceae(100)	Pseudomonadaceae_unclassified(100)	OTU94	0	0	0	4	0	0	0	0	0	0
Firmicutes(100)	Clostridia(100)	Clostridiales(100)	Peptococcaceae_1(100)	Desulfosporosinus(100)	OTU95	0	0	0	2	0	0	0	0	0	0
Proteobacteria(100)	Gammaproteobacteria(100)	Pseudomonadales(99)	Pseudomonadaceae(99)	Pseudomonadaceae_unclassified(99)	OTU96	1	0	0	0	0	0	0	0	0	0
Proteobacteria(100)	Gammaproteobacteria(100)	Pseudomonadales(99)	Pseudomonadaceae(99)	Pseudomonadaceae_unclassified(99)	OTU97	3	0	0	0	0	0	0	0	0	0
Proteobacteria(100)	Gammaproteobacteria(100)	Pseudomonadales(99)	Pseudomonadaceae(99)	Pseudomonadaceae_unclassified(99)	OTU99	1	0	0	0	0	0	0	0	0	0
